# Supplementary material
Source: PubMed Central journal article supplement (PMC7219543)
Supplement: NIHMS1584665-supplement-Chung_et_al_supplement.pdf [file NIHMS1584665-supplement-Chung_et_al_supplement.pdf]

## Supplementary Materials for

### **Interleukin 17 and senescent cells regulate the foreign body response to synthetic material implants in mice and humans**

Liam Chung, David Maestas Jr, Andriana Lebid, Ashlie Mageau, Gedge D. Rosson, Xinqun Wu, Matthew T. Wolf, Ada Tam, Isabel Vanderzee, Xiaokun Wang, James I. Andorko, Hong Zhang, Radhika Narain, Kaitlyn Sadtler, Hongni Fan, Daniela Čiháková, Claude Jourdan Le Saux, Franck Housseau, Drew M. Pardoll, Jennifer H. Elisseeff\*

\*Corresponding author. Email: [jhe@jhu.edu](mailto:jhe@jhu.edu)

Published 15 April 2020, *Sci. Transl. Med.* **12**, eaax3799 (2020)

DOI: 10.1126/scitranslmed.aax3799

#### **The PDF file includes:**

Fig. S1. CD3<sup>+</sup> T cells are up-regulated in human fibrotic capsule tissue.

Fig. S2. IL17, but not IFN $\gamma$  or IL4, is expressed in response to implanted synthetic material.

Fig. S3. Expression profile of immune cells surrounding synthetic material implants is proinflammatory.

Fig. S4. Systemic immune homeostasis is influenced by synthetic material implants in mice.

Fig. S5. Type 17 immune response induced by synthetic material is antigen dependent.

Fig. S6. IL17-deficient mice have a reduced fibrotic response to implanted synthetic materials.

Fig. S7. Type 17 immune response regulates the recruitment of myeloid cells.

Fig. S8. IL17 induces development of senescent fibroblasts.

Table S1. List of SYBR Green mouse mRNA primers.

Table S2. List of mouse TaqMan gene expression primers.

Table S3. List of human TaqMan gene expression primers.

Table S4. Antibodies used for flow cytometry (myeloid panel).

Table S5. Antibodies used for flow cytometry (lymphoid panel).

#### **Other Supplementary Material for this manuscript includes the following:**

(available at [stm.sciencemag.org/cgi/content/full/12/539/eaax3799/DC1](http://stm.sciencemag.org/cgi/content/full/12/539/eaax3799/DC1))

Data file S1 (Microsoft Excel format). Individual-level data for all figures.

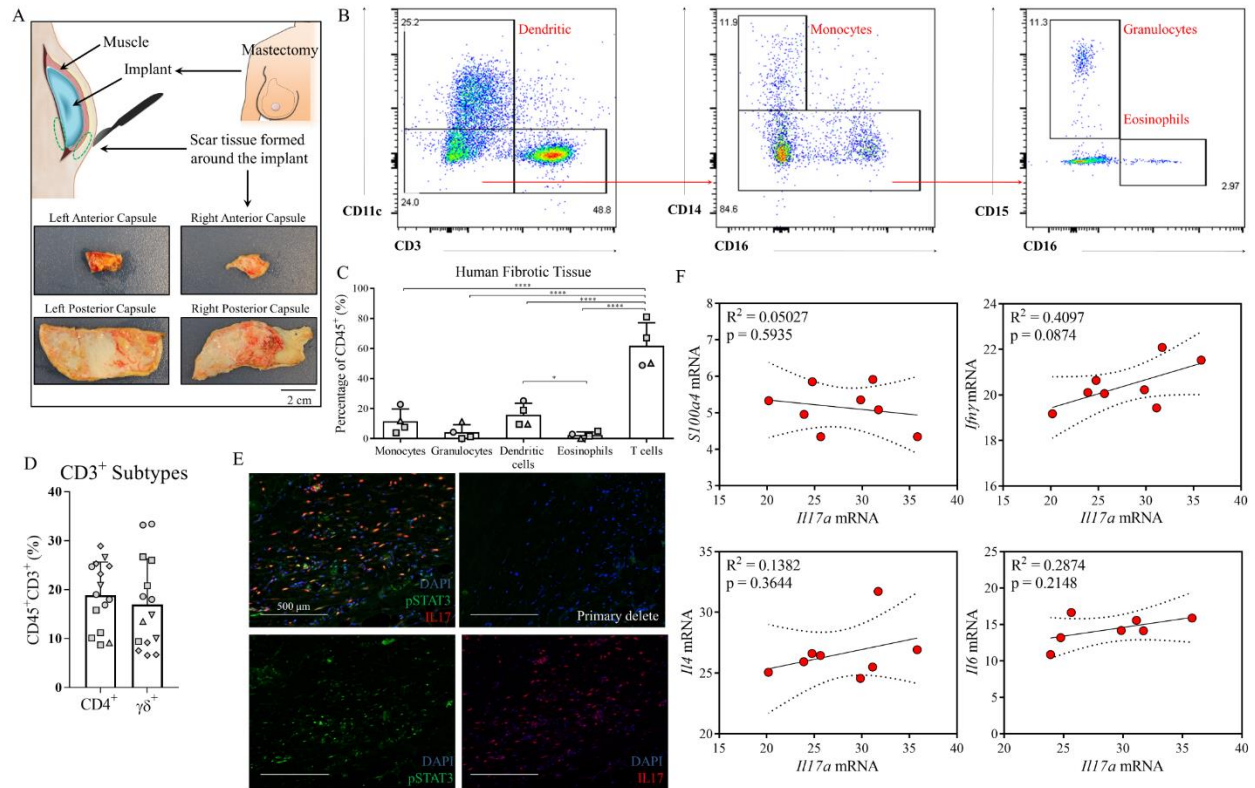

**Fig. S1. CD3<sup>+</sup> T cells are up-regulated in human fibrotic capsule tissue.** (A) Illustration of human fibrotic capsule extraction and gross images of the implants. (B, C) Representative flow cytometry plot and quantification of myeloid derived cells, including monocytes (CD3<sup>-</sup>CD11c<sup>-</sup>CD14<sup>+</sup>CD16<sup>-</sup>), granulocytes (CD3<sup>-</sup>CD11c<sup>-</sup>CD14<sup>+</sup>CD16<sup>+</sup>CD15<sup>+</sup>), eosinophils (CD3<sup>-</sup>CD11c<sup>-</sup>CD14<sup>+</sup>CD16<sup>+</sup>CD15<sup>-</sup>), dendritic cells (CD3<sup>-</sup>CD11c<sup>+</sup>), and lymphoid derived T cells (CD3<sup>+</sup>CD11c<sup>-</sup>). (D) Quantification of the percentage of CD4<sup>+</sup> T cells and  $\gamma\delta$ <sup>+</sup> T cells in 5 patients. (E) Immunofluorescence imaging showing pSTAT3 and IL17 in human fibrous capsule, followed by single staining controls and primary delete. (F) Correlation of qRT-PCR gene expression between *Il17a* mRNA and fibrosis-associated genes, including *S100a4*, *Ifn $\gamma$* , *Il4*, and *Il6*. Data are mean  $\pm$  SD, n = 3 (panel C), n = 8 (panel D), n = 5 (panel F). \*\*\*\*P < 0.0001, \*\*\*P < 0.001, \*\*P < 0.01, \*P < 0.05 by ANOVA for data in panels C, D, or linear regression in panel F.

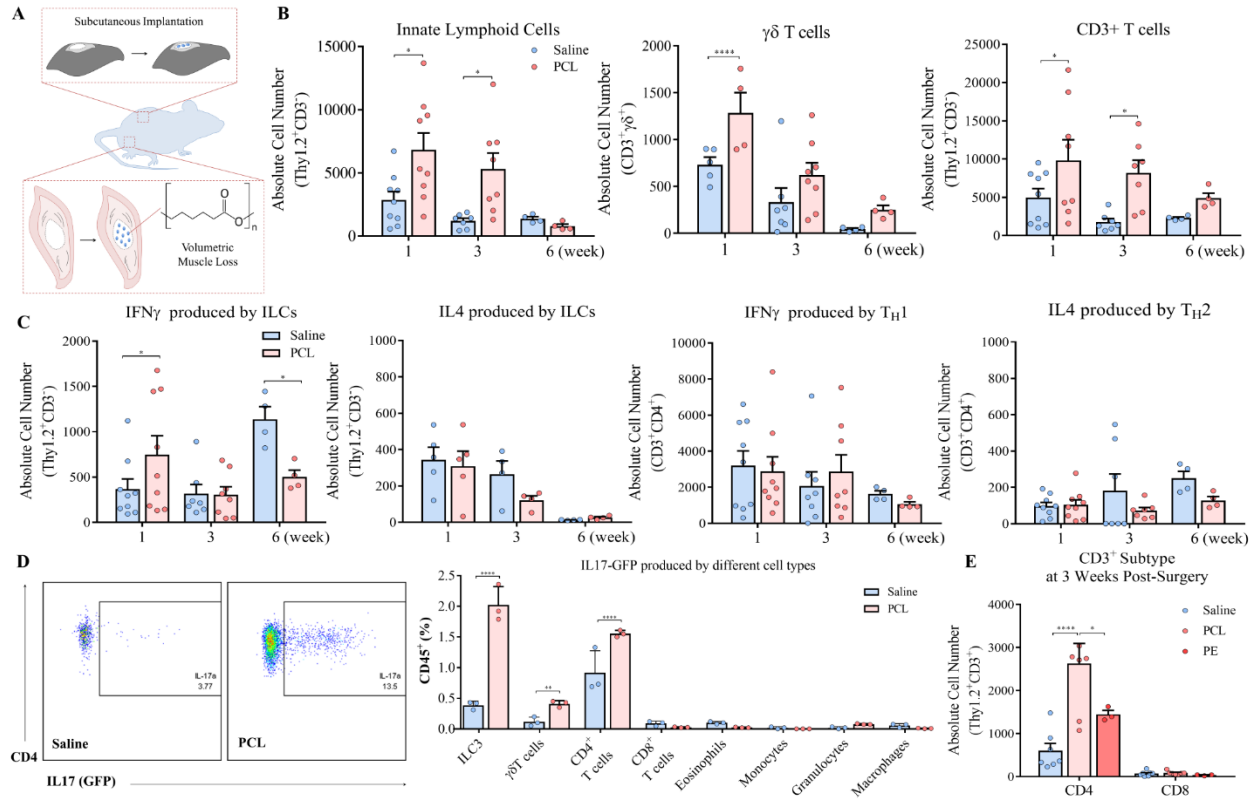

**Fig. S2. IL17, but not IFN $\gamma$  or IL4, is expressed in response to implanted synthetic material.** (A) Illustration of volumetric muscle loss (VML) and subcutaneous (SQ) implants in the murine model. (B) Flow cytometry analysis of the total number of ILCs,  $\gamma\delta$ <sup>+</sup> T cells, and CD3<sup>+</sup> T cells at 1, 3, and 6-weeks post-surgery. (C) Kinetics of IFN $\gamma$  and IL4 expression by ILCs,  $\gamma\delta$ <sup>+</sup> T cells, and CD4<sup>+</sup> T helper cells at various post-injury time points. (D) Quantification of IL17A expression across different cell types 3-weeks post-surgery in an IL17A-GFP reporter mice. (E) Comparison of CD4<sup>+</sup> and CD8<sup>+</sup> T cells at 3-weeks post-injury with PCL and PE implant. Data are mean  $\pm$  SD, n = 4-8 (panels B, C), n = 3 (panel D), n = 3-7 (panel E). \*\*\*\*P < 0.0001, \*\*\*P < 0.001, \*\*P < 0.01, \*P < 0.05 by ANOVA for panel B, C, D, and E.

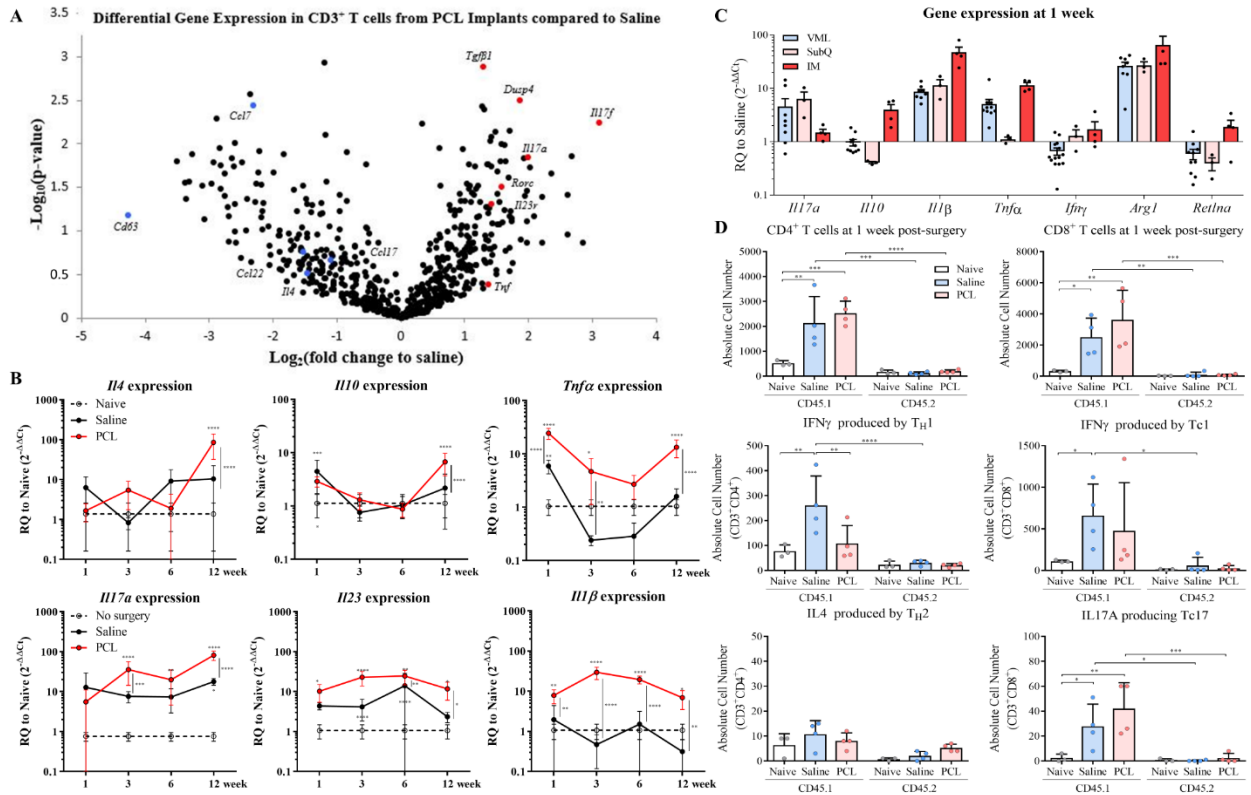

**Fig. S3. Expression profile of immune cells surrounding synthetic material implants is**

**proinflammatory.** (A) CD3<sup>+</sup> T cells were sorted for gene expression analysis using the

NanoString platform. Volcano plot of genes differentially regulated in PCL-derived T cells

compared to saline (no implant) control at day 7 post-surgery. Type 17-associated gene

expression differences are highlighted. (B) qRT-PCR gene expression normalized to healthy

muscle control showing kinetics of *Il4*, *Il10*, *Il17a*, *Il23*, *Tnfa*, and *Il1beta* transcripts. (C) Gene

expression analysis comparing levels of different cytokines between the VML model and

subcutaneous (SQ) implant, and intramuscular injection (IM) model at 1-week post-injury. (D)

Total number of CD4 and CD8 infiltration, T<sub>H</sub>1, and T<sub>H</sub>2, Tc1, Tc17 from CD45.1 (Wildtype donor) and

CD45.2 (OTII-Rag<sup>-/-</sup> donor) bone marrow chimera mice 1 week after VML. Data are means  $\pm$  SEM

(B), mean  $\pm$  SD, n = 3-5 (panel B), n = 3-14 (panel C), n = 4 (panel D). \*\*\*\*P < 0.0001, \*\*\*P <

0.001, \*\*P < 0.01, \*P < 0.05 by ANOVA for panel B, C, and D. Data for Fig. S3A are supplied

as a separate Excel file.

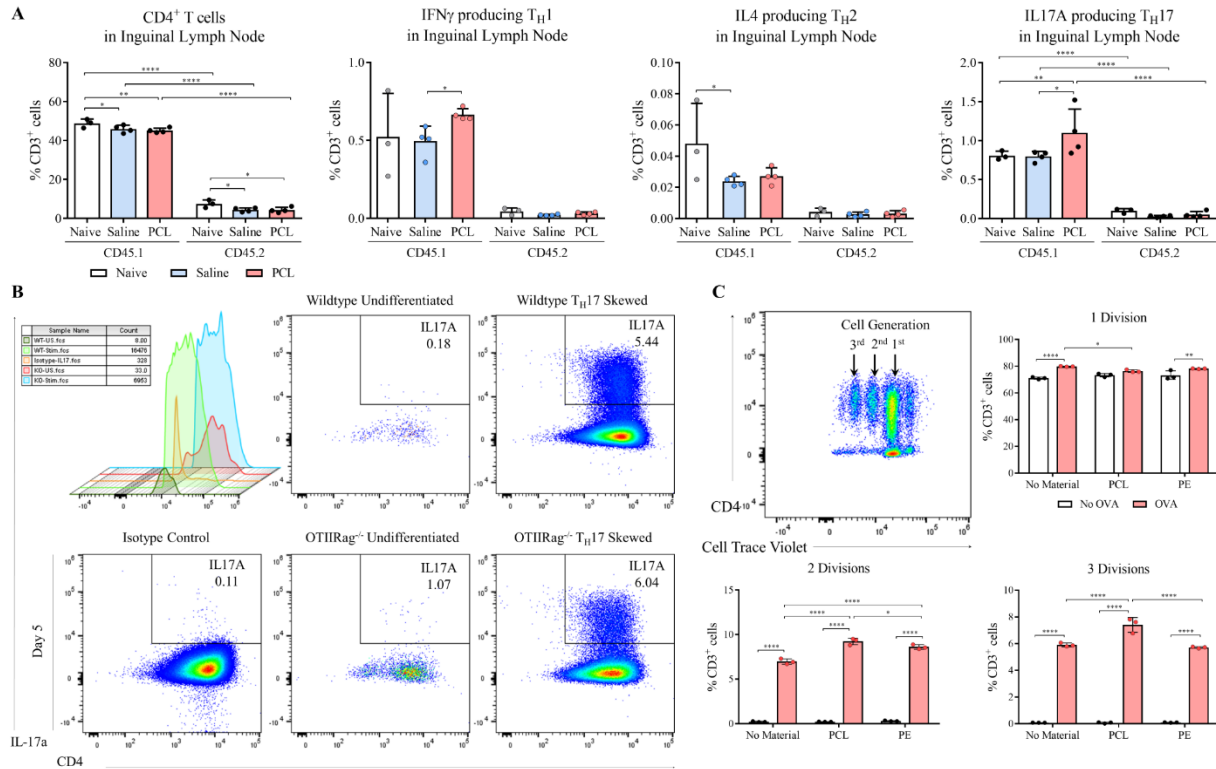

**Fig. S4. Systemic immune homeostasis is influenced by synthetic material implants in mice.**

(A) Total number of immune cells infiltration and  $T_H17$  from CD45.1 (Wildtype donor) and CD45.2 (OTII-Rag<sup>-/-</sup> donor) bone marrow chimera mice 1 week after VML. Percent of CD4<sup>+</sup> T cells,  $T_H1$ ,  $T_H2$ , and  $T_H17$  cells from CD45.1 and CD45.2 in draining lymph nodes were evaluated. (B) *In vitro* differentiation of  $T_H17$  cells of OTII-Rag<sup>-/-</sup> compared to Wildtype naïve CD4<sup>+</sup> cells. (C) Proliferation assay of T cells co-cultured with splenocytes from OT-II transgenic mice cultured with different materials (PCL or PE) and OVA antigen. Representative plots for proliferation assay were shown. Data are mean  $\pm$  SD, n = 3-4 (panel A), n = 3 (panel C). \*\*\*\*P < 0.0001, \*\*\*P < 0.001, \*\*P < 0.01, \*P < 0.05 by ANOVA for panel A, C.

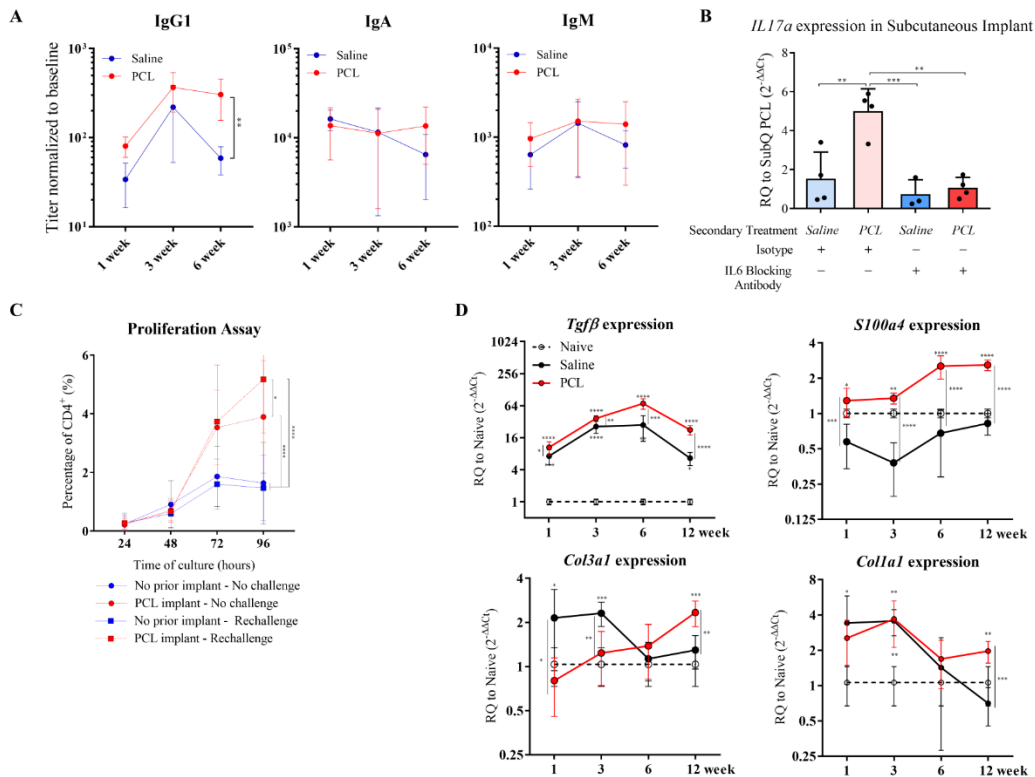

**Fig. S5. Type 17 immune response induced by synthetic material is antigen dependent. (A)**

IgG1, IgM, and IgA antibody titers were detected using an enzyme-linked immunosorbent assay (ELISA) system on serum collected 1, 3, and 6-weeks post-surgery and implantation. **(B)** Gene

expressions of *Il17a* on SubQ implant in mice previously primed with PCL implant in VML. In addition, neutralizing antibody IL6 (100  $\mu$ g/mL each mouse per day for 5 consecutive days) or isotype control (rat IgG1) was administered intraperitoneally at 2-weeks post-VML. **(C)**

Splenocytes were isolated from mice received initial challenge with PCL implant or saline control. Cells were labeled with CellTrace Violet proliferation dye. In culture, PCL were re-introduced to investigate the memory response. Proliferation were evaluated via flow cytometry at 24, 48, 72, and 96 hours. **(D)** qRT-PCR gene expression normalized to healthy muscle controls

showing kinetics of *Tgfβ*, *S100a4*, *Col1a1* and *Col3a1* progression in PCL implant mice compared to saline control overtime. Data are mean  $\pm$  SD, n = 3-5 (panels A, B, D), n = 3-9

(panel C). \*\*\*\*P < 0.0001, \*\*\*P < 0.001, \*\*P < 0.01, \*P < 0.05 by ANOVA for panel A, B, C,

and D.

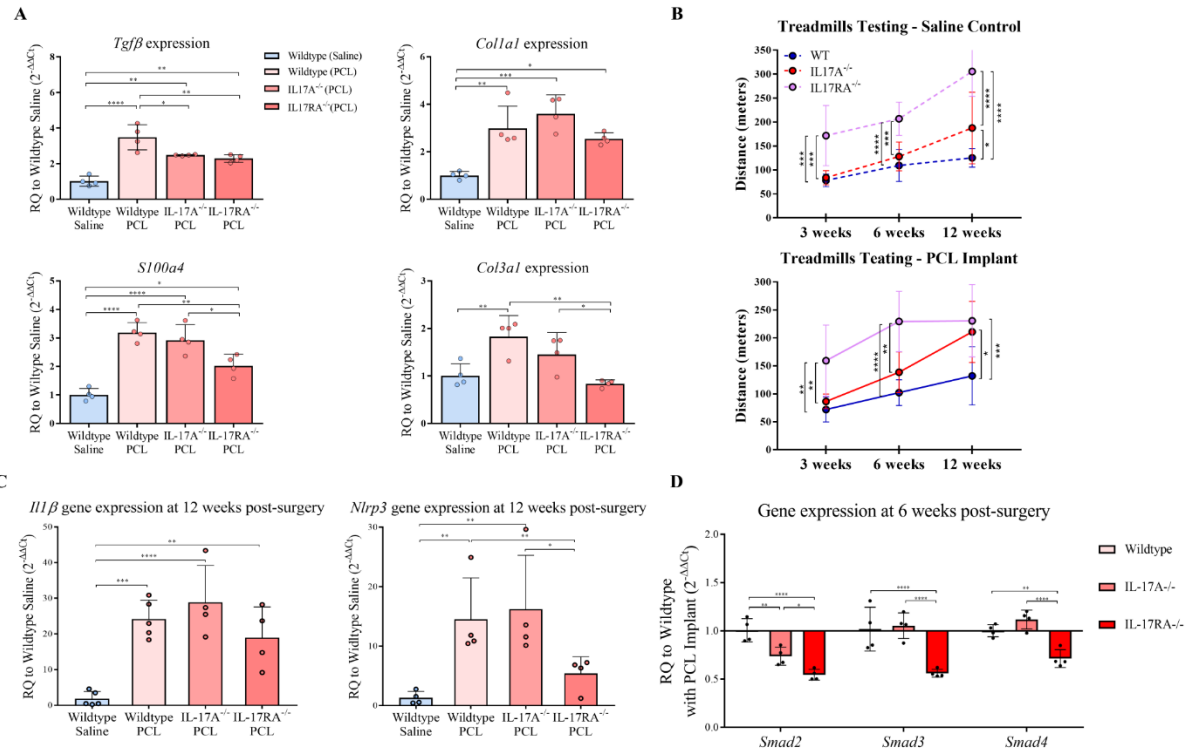

**Fig. S6. IL17-deficient mice have a reduced fibrotic response to implanted synthetic materials.** (A) Gene expression analysis of fibrotic markers in the whole tissue including *Tgfb*, *S100a4*, and *Col3a1* in Wildtype, IL17A<sup>-/-</sup>, and IL17RA<sup>-/-</sup> mice at 12-weeks post-surgery. (B) Treadmill exhaustion assay 3, 6, and 12-weeks post-implantation of Wildtype, IL17A<sup>-/-</sup>, and IL17RA<sup>-/-</sup> mice. (C) qRT-PCR analysis of inflammasome related genes including *Il1b* and *Nlrp3* was performed in Wildtype, IL17A<sup>-/-</sup>, and IL17RA<sup>-/-</sup> mice at 12-weeks post-surgery. (D) Gene expressions of *Smad2*, *Smad3*, and *Smad4* in Wildtype, IL17A<sup>-/-</sup>, and IL17RA<sup>-/-</sup> mice at 6-weeks post-surgery were shown. Data are mean ± SD (B), n = 4-5 (panel A, C, D), n = 4-10 (panel B). \*\*\*\*P < 0.0001, \*\*\*P < 0.001, \*\*P < 0.01, \*P < 0.05 by ANOVA for panel A, B, C, and D.



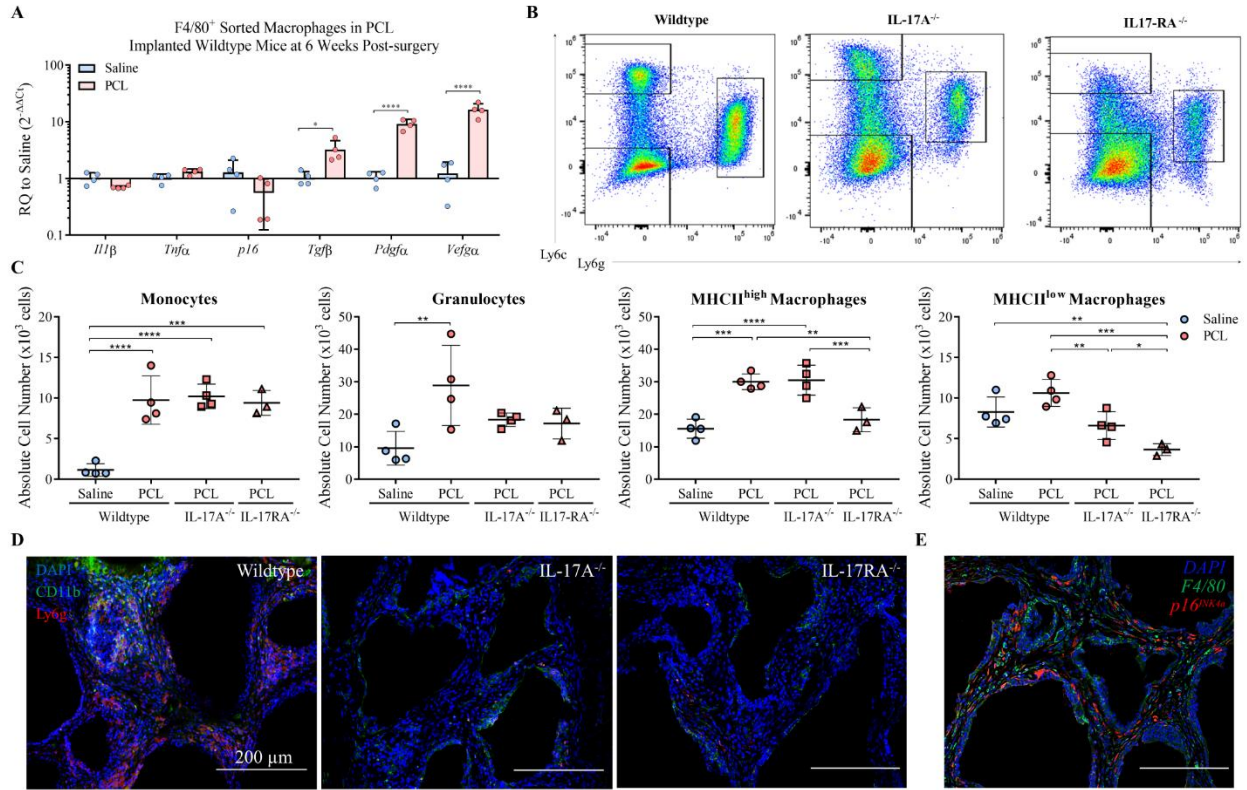

**Fig. S7. Type 17 immune response regulates the recruitment of myeloid cells.** (A) Gene expression analysis of F4/80<sup>+</sup> cells sorted from PCL implanted Wildtype mice 6-weeks post-surgery. (B) Flow cytometry representative plots comparing different populations of myeloid cells in Wildtype, IL17A<sup>-/-</sup>, and IL17RA<sup>-/-</sup> mice. (C) Quantification of granulocytes (CD11b<sup>+</sup>Ly6c<sup>int</sup>Ly6g<sup>high</sup>), MHCII<sup>high</sup> macrophages (CD11b<sup>+</sup>Ly6c<sup>low</sup>Ly6g<sup>low</sup>MHCII<sup>high</sup>F4/80<sup>+</sup>), MHCII<sup>low</sup> macrophages (CD11b<sup>+</sup>Ly6c<sup>low</sup>Ly6g<sup>low</sup>MHCII<sup>low</sup>F4/80<sup>+</sup>), and monocytes (CD11b<sup>+</sup>Ly6c<sup>high</sup>Ly6g<sup>low</sup>) in Wildtype, IL17A<sup>-/-</sup>, and IL17RA<sup>-/-</sup> mice after 3 weeks with PCL implants. (D) Immunofluorescence imaging of CD11B and LY6G around PCL implants in Wildtype and IL17 signaling deficient mice 12-weeks post-surgery. (E) Immunofluorescence imaging of F4/80 and p16<sup>INK4a</sup> in Wildtype mice 12-weeks post-surgery. Data are mean ± SD, n = 4 (panel A), n = 3-4 (panel C). \*\*\*\*P < 0.0001, \*\*\*P < 0.001, \*\*P < 0.01, \*P < 0.05 by ANOVA for panel A and C.



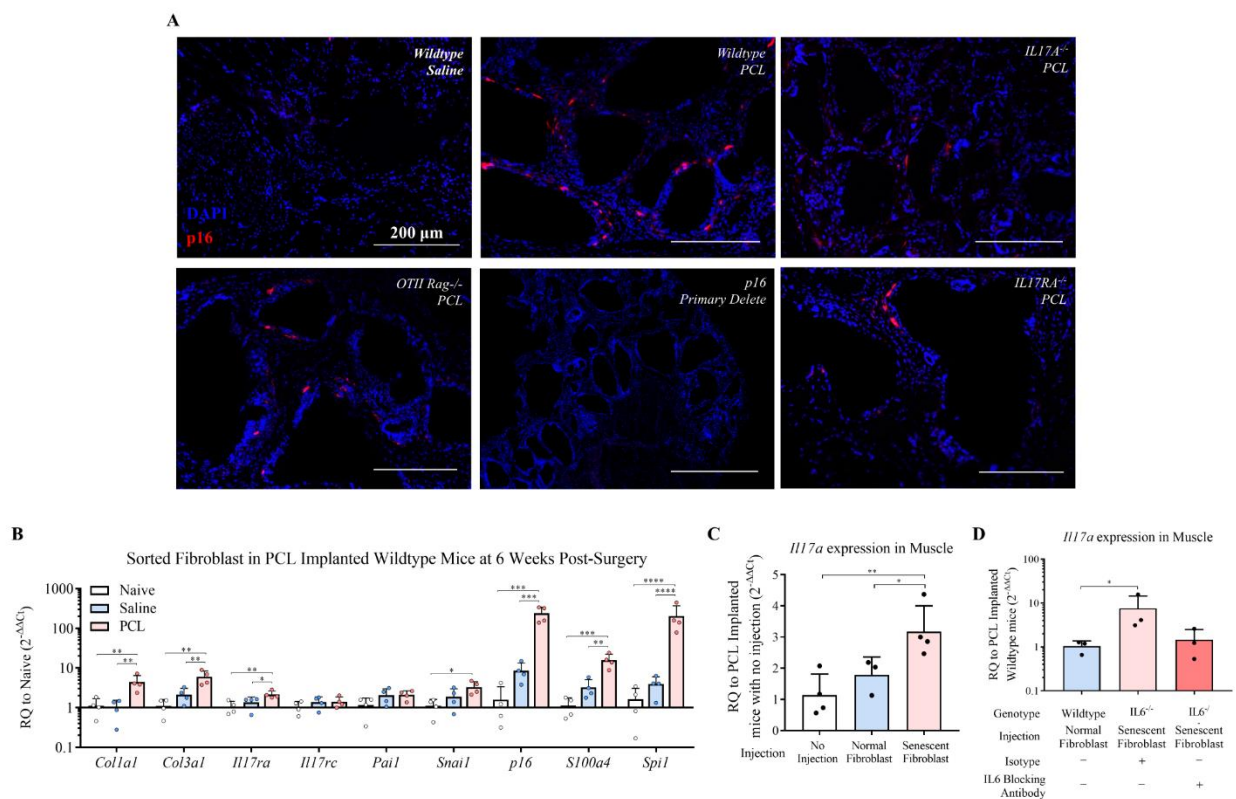

**Fig. S8. IL17 induces development of senescent fibroblasts.** (A) Immunofluorescence staining of p16<sup>INK4a</sup> (red) in Wildtype, IL17A<sup>-/-</sup>, and IL17RA<sup>-/-</sup>, OTII-Rag<sup>-/-</sup> mice at 6-weeks post-injury, followed by primary antibody delete control. (B) Gene expression analysis of fibroblasts sorted from PCL implanted Wildtype mice 6-weeks post-surgery. (C) Gene expressions of *Il17a* in mice that received injection of normal fibroblast or senescent fibroblasts compared to no injection control. (D) Gene expressions of *Il17a* at 1-week post-VML in IL6<sup>-/-</sup> mice that received injection of senescent fibroblasts compared to normal fibroblasts. Data are mean  $\pm$  SD, n = 4 (panel B), n = 3-4 (panel C), n = 3 (panel D). \*\*\*\*P < 0.0001, \*\*\*P < 0.001, \*\*P < 0.01, \*P < 0.05 by ANOVA for panel B, C, and D.

**Table S1. List of SYBR Green mouse mRNA primers.**

| <b>Primer</b>           | <b>Forward Sequence</b>            | <b>Primer</b>           | <b>Reverse Sequence</b>           |
|-------------------------|------------------------------------|-------------------------|-----------------------------------|
| $\beta$ 2m<br>forward   | CTC GGT GAC CCT GGT CTT TC         | $\beta$ 2m<br>reverse   | GGATTT CAA TGT GAG GCG GG         |
| Tnf $\alpha$<br>forward | GTC CAT TCC TGA GTT CTG            | Tnf $\alpha$<br>reverse | GAA AGG TCT GAA GGT AGG           |
| Il1 $\beta$<br>forward  | GTA TGG GCT GGA CTG TTT C          | Il1 $\beta$<br>reverse  | GCT GTC TGC TCA TTC ACG           |
| Retnla<br>forward       | CTT TCC TGA GAT TCT GCC CCA<br>G   | Retnla<br>reverse       | CAC AAG CAC ACC CAG TAG CA        |
| Ifny<br>forward         | TCA AGT GGC ATA GAT GTG<br>GAA     | Ifny<br>reverse         | TGA GGT AGA AAG AGA TAA<br>TCT GG |
| Il4<br>forward          | ACA GGA GAA GGG ACG CCA T          | Il4<br>reverse          | ACC TTG GAA GCC CTA CAG A         |
| Il17a<br>forward        | TCA GCG TGT CCA AAC ACT<br>GAG     | Il17a<br>reverse        | CGC CAA GGG AGT TAA AGA<br>CTT    |
| Arginase 1<br>forward   | CAG AAG AAT GGA AGA GTC AG         | Arginase 1<br>reverse   | CAG ATA TGC AGG GAG TCA CC        |
| Cdkn2a (p16)<br>forward | AAT CTC CGC GAG GAA AGC            | p16<br>reverse          | GTC TGC AGC GGA CTC CAT S         |
| Cdkn2b (p15)<br>forward | AGA TCC CAA CGC CCT GAA C          | p15<br>reverse          | CCC ATC ATC ATG ACC TGG ATT       |
| Il10<br>forward         | CAG GAC TTT AAG GGT TAC<br>TTG GGT | Il10<br>reverse         | GCC TGG GGC ATC ACT TCT AC        |

**Table S2. List of mouse TaqMan gene expression primers.**

| <b>Primer</b>  | <b>Assay ID:</b> | <b>Primer</b> | <b>Assay ID</b> |
|----------------|------------------|---------------|-----------------|
| $\beta$ 2m     | Mm00437762       | Il17a         | Mm00439618      |
| Col1a1         | Mm00801666       | Il23a         | Mm00518984      |
| Col3a1         | Mm00802300       | S100a4        | Mm00803372      |
| Pai1           | Mm00435858       | Snai1         | Mm00441533      |
| Tgf $\beta$ -1 | Mm01178820       | p16           | Mm00494449      |
| Nlrp3          | Mm00840904       | Smad2         | Mm00487530      |
| Smad3          | Mm01170760       | Smad4         | Mm03023996      |

**Table S3. List of human TaqMan gene expression primers.**

| Primer       | Assay ID:  | Primer         | Assay ID   |
|--------------|------------|----------------|------------|
| $\beta$ 2m   | Hs00187842 | Il17a          | Hs00174383 |
| Col1a1       | Hs00164004 | STAT3          | Hs00374280 |
| Col3a1       | Hs00943809 | S100a4         | Hs00243202 |
| p16          | Hs00923894 | Tgf $\beta$ -1 | Hs00998133 |
| Cdkn1a (p21) | Hs00355782 | Ifn $\gamma$   | Hs00989291 |
| Il4          | Hs00174122 | Il6            | Hs00174131 |

**Table S4. Antibodies used for flow cytometry (myeloid panel).**

| Fluorophore    | Marker    | Manufacturer      | Catalogue |
|----------------|-----------|-------------------|-----------|
| Fixable Yellow | Live/Dead | Life Technologies | L34968    |
| AF488          | MHC-II    | BioLegend         | 107615    |
| PerCP-Cy5.5    | CD11b     | BioLegend         | 101227    |
| APC-Cy7        | CD11c     | BioLegend         | 117323    |
| PE-CF594       | Siglec F  | BDbiosciences     | 562757    |
| Pacific Blue   | Ly6c      | BioLegend         | 128013    |
| AF647          | Ly6g      | BioLegend         | 127609    |
| BV510          | CD45      | BioLegend         | 103137    |
| PE-Cy7         | F4/80     | BioLegend         | 123113    |

**Table S5. Antibodies used for flow cytometry (lymphoid panel).**

| <b>Fluorophore</b> | <b>Marker</b>       | <b>Manufacturer</b> | <b>Catalogue</b> |
|--------------------|---------------------|---------------------|------------------|
| Fixable eFlour 780 | Live/Dead           | Life Technologies   | 65-0865-14       |
| BV786              | CD3                 | BDbiosciences       | 564010           |
| FITC               | CD4                 | BioLegend           | 100509           |
| BV711              | CD8                 | BioLegend           | 100747           |
| PE-CF594           | $\gamma\delta$ -TCR | BDbiosciences       | 563532           |
| APC                | IFN $\gamma$        | BioLegend           | 505809           |
| PE                 | IL4                 | BioLegend           | 504103           |
| AF700              | IL17A               | BioLegend           | 506914           |
| BV510              | CD45                | BioLegend           | 103137           |
| PE-Cy7             | Thy1.2              | BioLegend           | 140309           |
